# Supplementary material for: Anti-CELA1 antibody KF4 prevents emphysema by inhibiting stretch-mediated remodeling
Source: JCI Insight. 2024 Jan 9;9(1):e169189. doi: 10.1172/jci.insight.169189 (PMC10906462; doi:10.1172/jci.insight.169189)
Supplement: Supplemental data [file jciinsight-9-169189-s055.pdf]

Supplemental Table 1: Human Subject Demographics

| Supplemental Table 1: Subject Demographic Characteristics |                |               |             |        |                |            |                      |
|-----------------------------------------------------------|----------------|---------------|-------------|--------|----------------|------------|----------------------|
| Specimen_ID                                               | Source         | Group         | Age (years) | Sex    | Current Smoker | Pack Years | Other                |
| 15215                                                     | BioLINCC/L TRC | Non-Smoker    | 80          | Female | Unknown        | Unknown    | Old Age specimen     |
| 15473                                                     | BioLINCC/L TRC | COPD          | 66          | Female | Unknown        | Unknown    | GOLD 3, R lower      |
| 40985                                                     | BioLINCC/L TRC | Non-Smoker    | 47          | Female | Unknown        | Unknown    | R lower              |
| 94308                                                     | BioLINCC/L TRC | Non-Smoker    | 67          | Male   | Unknown        | Unknown    | R lower              |
| 107367                                                    | BioLINCC/L TRC | Former Smoker | 80          | Male   | Unknown        | Unknown    | R lower              |
| 180982                                                    | BioLINCC/L TRC | Non-Smoker    | 51          | Male   | Unknown        | Unknown    | R lower              |
| 181462                                                    | BioLINCC/L TRC | Smoker        | 54          | Female | Unknown        | Unknown    | R lower              |
| 185233                                                    | BioLINCC/L TRC | Smoker        | 58          | Female | Unknown        | Unknown    | R middle             |
| 191599                                                    | BioLINCC/L TRC | Non-Smoker    | 72          | Male   | Unknown        | Unknown    | AAT project, Geno MS |
| 195939                                                    | BioLINCC/L TRC | Former Smoker | 57          | Male   | Unknown        | Unknown    | R lower              |
| 203575                                                    | BioLINCC/L TRC | Non-Smoker    | 62          | Female | Unknown        | Unknown    | L lingula            |
| 204969                                                    | BioLINCC/L TRC | COPD          | 68          |        | Unknown        | Unknown    | GOLD 4, R lung       |
| 216921                                                    | BioLINCC/L TRC | Former Smoker | 61          | Male   | Unknown        | Unknown    | L upper              |
| 221228                                                    | BioLINCC/L TRC | Non-Smoker    | 69          | Male   | Unknown        | Unknown    | L upper              |
| 244293                                                    | BioLINCC/L TRC | Non-Smoker    | 63          | Female | Unknown        | Unknown    | R upper              |
| 249864                                                    | BioLINCC/L TRC | Non-Smoker    | 61          | Female | Unknown        | Unknown    | L lower              |
| 254654                                                    | BioLINCC/L TRC | Smoker        | 42          | Male   | Unknown        | Unknown    | R lower              |
| 274080                                                    | BioLINCC/L TRC | Non-Smoker    | 60          | Male   | Unknown        | Unknown    | R lower              |
| 274496                                                    | BioLINCC/L TRC | COPD          | 76          |        | Unknown        | Unknown    | GOLD 2, R lung       |
| 282998                                                    | BioLINCC/L TRC | Non-Smoker    | 74          | Female | Unknown        | Unknown    | R upper              |
| 289294                                                    | BioLINCC/L TRC | COPD          | 56          |        | Unknown        | Unknown    | GOLD 2 R lower       |
| 300009                                                    | BioLINCC/L TRC | Former Smoker | 73          | Male   | Unknown        | Unknown    | R lower              |
| 300020                                                    | BioLINCC/L TRC | Smoker        | 55          | Male   | Unknown        | Unknown    | L lung               |

|        |                 |            |    |        |         |         |                 |
|--------|-----------------|------------|----|--------|---------|---------|-----------------|
| 400012 | BioLINCC/L TRC  | Non-Smoker | 58 | Male   | Unknown | Unknown | R lower         |
| 400033 | BioLINCC/L TRC  | Non-Smoker | 44 | Male   | Unknown | Unknown |                 |
| 400054 | BioLINCC/L TRC  | Non-Smoker | 44 | Female | Unknown | Unknown | R lower         |
| 400056 | BioLINCC/L TRC  | Non-Smoker | 74 | Female | Unknown | Unknown | R middle        |
| 500015 | BioLINCC/L TRC  | Smoker     | 42 | Female | Unknown | Unknown | L upper         |
| 118781 | BioLINCC/L TRC  | COPD       | 59 |        | Unknown | Unknown | GOLD 3, R lower |
| 294945 | BioLINCC/L TRC  | COPD       | 52 |        | Unknown | Unknown | GOLD 4 R lung   |
| NJ 25  | National Jewish | COPD       | 50 | Male   | No      | Unknown | PF ratio 470    |
| NJ 5   | National Jewish | COPD       | 56 | Male   | Yes     | Unknown | PF ratio 321    |
| NJ 10  | National Jewish | Non-Smoker | 18 | Female | No      | 0       | PF ratio 427    |
| NJ 11  | National Jewish | Non-Smoker | 59 | Female | No      | 0       | PF ratio 263    |
| NJ 12  | National Jewish | Non-Smoker | 87 | Male   | No      | 0       |                 |
| NJ 13  | National Jewish | Non-Smoker | 51 | Female | No      | 0       |                 |
| NJ 14  | National Jewish | Non-Smoker | 51 | Female | No      | 0       |                 |
| NJ 15  | National Jewish | Non-Smoker | 61 | Male   | No      | 0       |                 |
| NJ 16  | National Jewish | Non-Smoker | 66 | Male   | No      | 0       | PF ratio 357    |
| NJ 17  | National Jewish | Non-Smoker | 26 | Male   | No      | 0       | PF ratio 343    |
| NJ 2   | National Jewish | Non-Smoker | 26 | Male   | Yes     | 1       | PF ratio 220    |
| NJ 26  | National Jewish | Non-Smoker | 46 | Male   | No      | 0       | PF ratio 308    |
| NJ 3   | National Jewish | Non-Smoker | 35 | Male   | No      | 0       | PF ratio 280    |
| NJ 6   | National Jewish | Non-Smoker | 35 | Female | No      | 0       | PF ratio 370    |
| NJ 8   | National Jewish | Non-Smoker | 39 | Male   | No      | 0       | PF ratio 270    |
| NJ 9   | National Jewish | Non-Smoker | 49 | Male   | No      | 0       |                 |
| NJ 18  | National Jewish | Smoker     | 28 | Male   | Yes     | Unknown | PF ratio 220    |
| NJ 19  | National Jewish | Smoker     | 32 | Male   | Yes     | Unknown | PF ratio 262    |
| NJ 20  | National Jewish | Smoker     | 50 | Female | Yes     | Unknown | PF ratio 481    |



Supplemental Table 2: Human CELA1 Peptides

| Supplemental Table 2: hCELA1 Peptides |                                  |
|---------------------------------------|----------------------------------|
| hCELA1 (30-54)                        | CGTEAGRNSWPSQISLQYRSGGSRYH       |
| hCELA1 (62-86)                        | CRQNWVMTAAHCVDYQKTRVAVAGDH       |
| hCELA1 (104-134)                      | CVVHPYWNSDNVAAGYDIALLRLAQSVTLNSY |
| hCELA1 (159-183)                      | CGKTKTNGQLAQTLLQAYLPSVDYAI       |
| hCELA1 (220-244)                      | CLVNGKYSVHGVTSFVSSRGCNVS         |

Supplemental Table 3: Taqman Primers

| Supplemental Table 3: Taqman Primers |                       |
|--------------------------------------|-----------------------|
| Target                               | Primer Catalog Number |
| Human Matrix Metalloproteinase-2     | 4331182_Hs01548727    |
| Human Matrix Metalloproteinase-8     | 4453320-Hs01029057    |
| Human Matrix Metalloproteinase-9     | 4453320-Hs00957562_m1 |
| Human Matrix Metalloproteinase-12    | 4448892-Hs00159178    |
| Human Matrix Metalloproteinase-14    | 4448892-Hs01037003    |
| Human Proteinase-3                   | 4448892-Hs01553330_m1 |
| Human Neutrophil Elastase            | 4331182-Hs00236952_m1 |
| Human Chymotrypsin-like Elastase 1   | 4331182-Hs00608115_m1 |
| Human Cathepsin G                    | 4448892-Hs00175195_m1 |
| Eukaryotic 18S RNA                   | 4333760T              |

Supplemental Table 4: SybrGreen Primers

| Supplemental Table 4: SybrGreen Primers |                      |
|-----------------------------------------|----------------------|
| Name                                    | Sequence             |
| MsCela1 FL1-Fwd                         | TTGTCGGAGAGCACAACTG  |
| MsCela1 FL1-Rev                         | CCAAGACACCAGCAGCATTC |
| MsGapdh(66-323) mRNA-Fwd                | AGAGTGTTTCCTCGTCCCGT |
| MsGapdh(66-323) mRNA-Rev                | TGATGTTAGTGGGGTCTCGC |

## Supplemental Figure Legends

Supplemental Figure 1

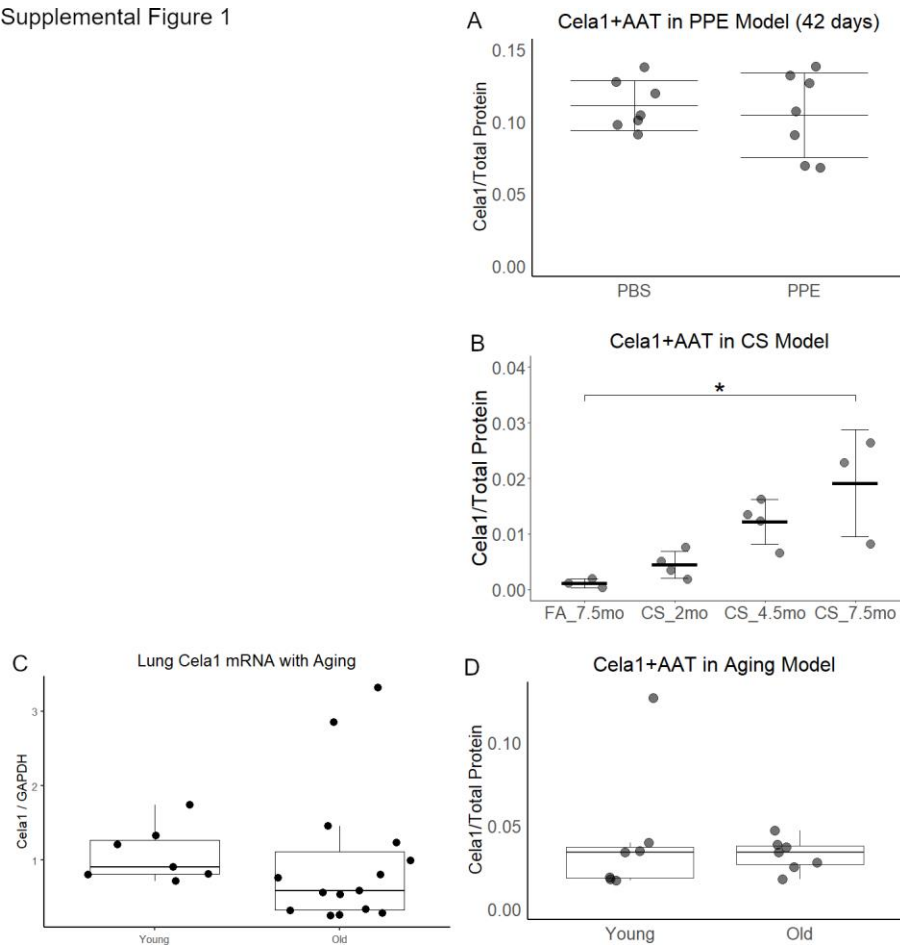

Supplemental Figure 1: Chymotrypsin-like Elastase 1 Expression in Three Mouse Models of Emphysema-Supplemental Data. (A) There was no difference in the amount of high molecular weight Celsr1 (previously shown to be Celsr1 neutralized by alpha-1 antitrypsin, Celsr1+AAT) at 42 days after porcine pancreatic elastase (PPE) compared to phosphate buffered saline (PBS). (B) The amount of high molecular weight Celsr1 increased with duration of cigarette smoke (CS) exposure compared to filtered air (FA). ANOVA  $p < 0.05$ , Holm Sidak *post hoc* test  $*p < 0.05$ . (C) Normalized *Celsr1* mRNA levels were no different in the aged (72-75 week old) mice compared to young (8-10 week). (D) There was also no difference in the amount of high molecular weight Celsr1 protein.

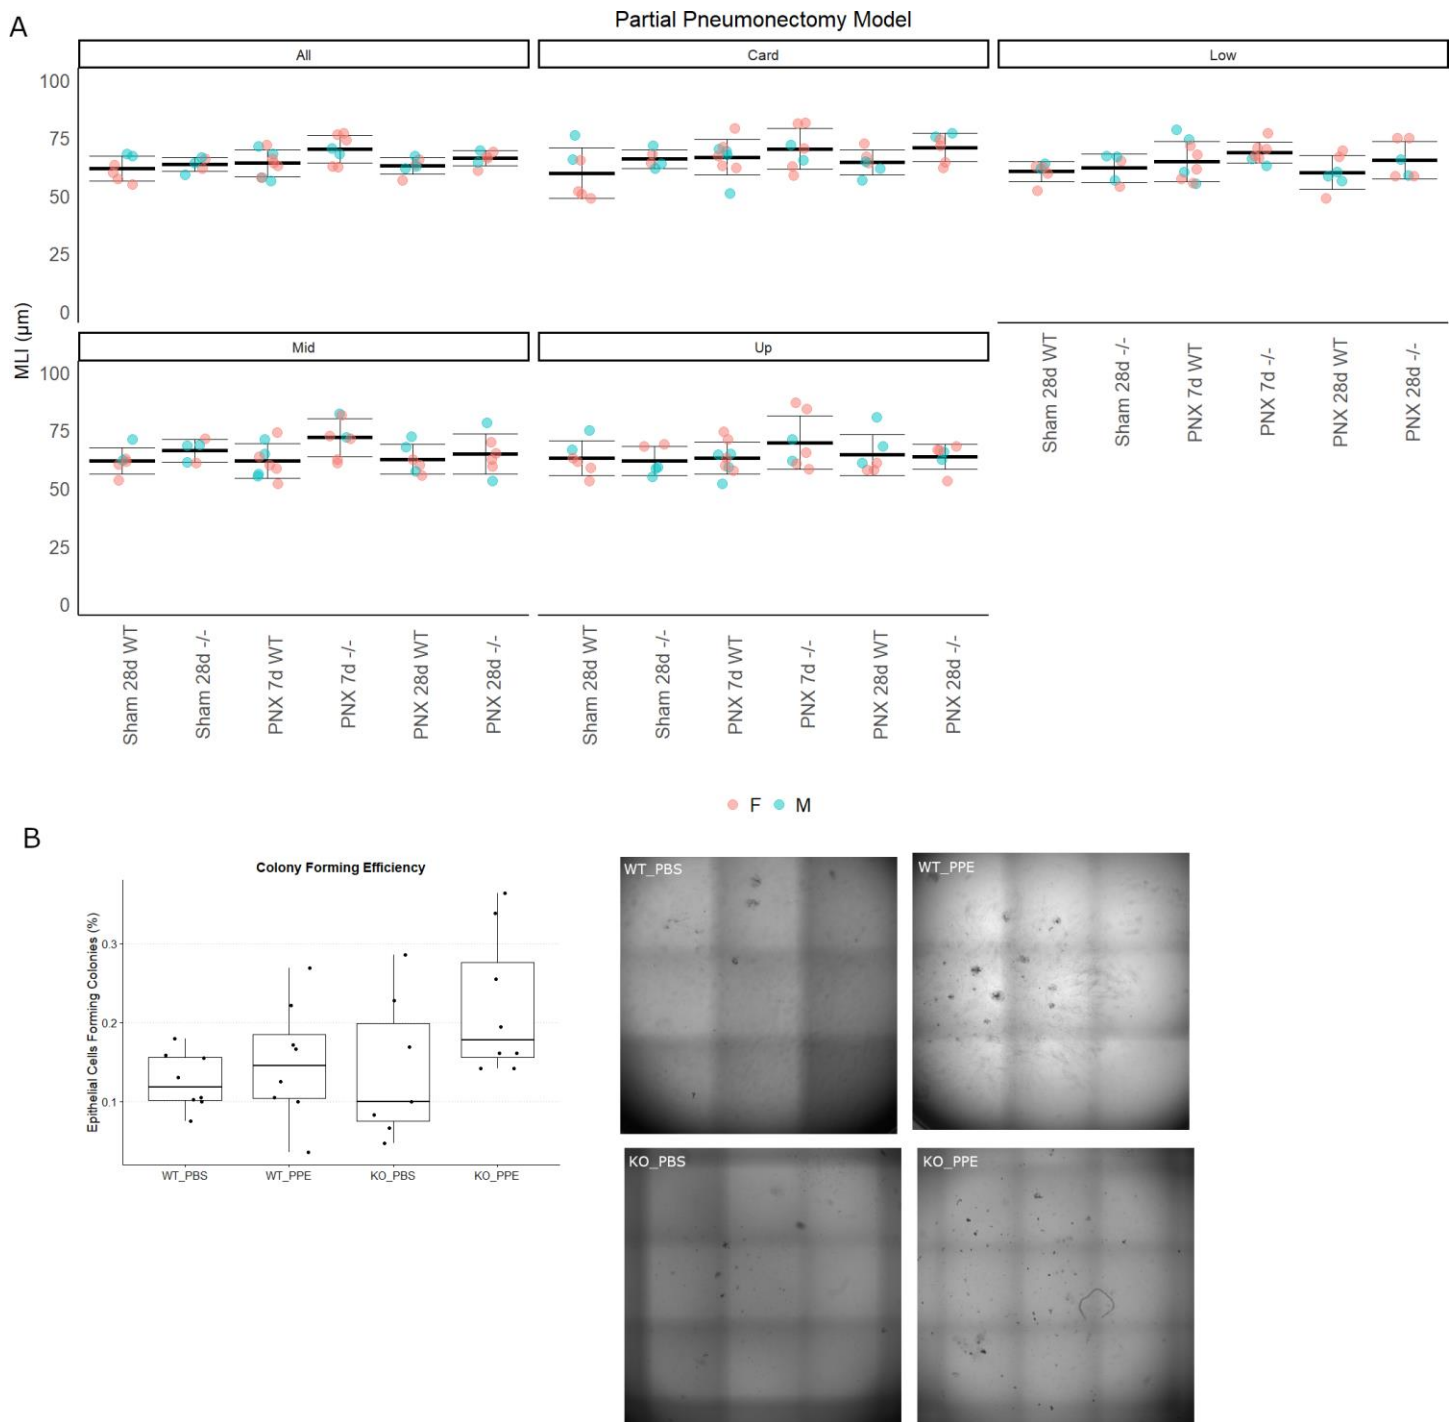

Supplemental Figure 2: No Impact of CELA1 in Compensatory Lung Re-growth after Partial Pneumonectomy. (A) Wildtype (WT) and *Cela1*<sup>-/-</sup> (-/-) mice were subjected to left lung partial pneumonectomy, and the airspace size of the remaining lung lobes quantified at 7 and 28 days. Mean linear intercepts (MLI) were compared to Sham at 28 days. A small increase in MLI in *Cela1*<sup>-/-</sup> mice at 7 days was not significant and normalized by 28 days. (B) Colony forming unit assays on epithelial cells from WT and *Cela1*<sup>-/-</sup> (KO) mice did not demonstrate any significant differences in the number of colonies, but there was a trend towards greater numbers in KO mice treated with PPE.

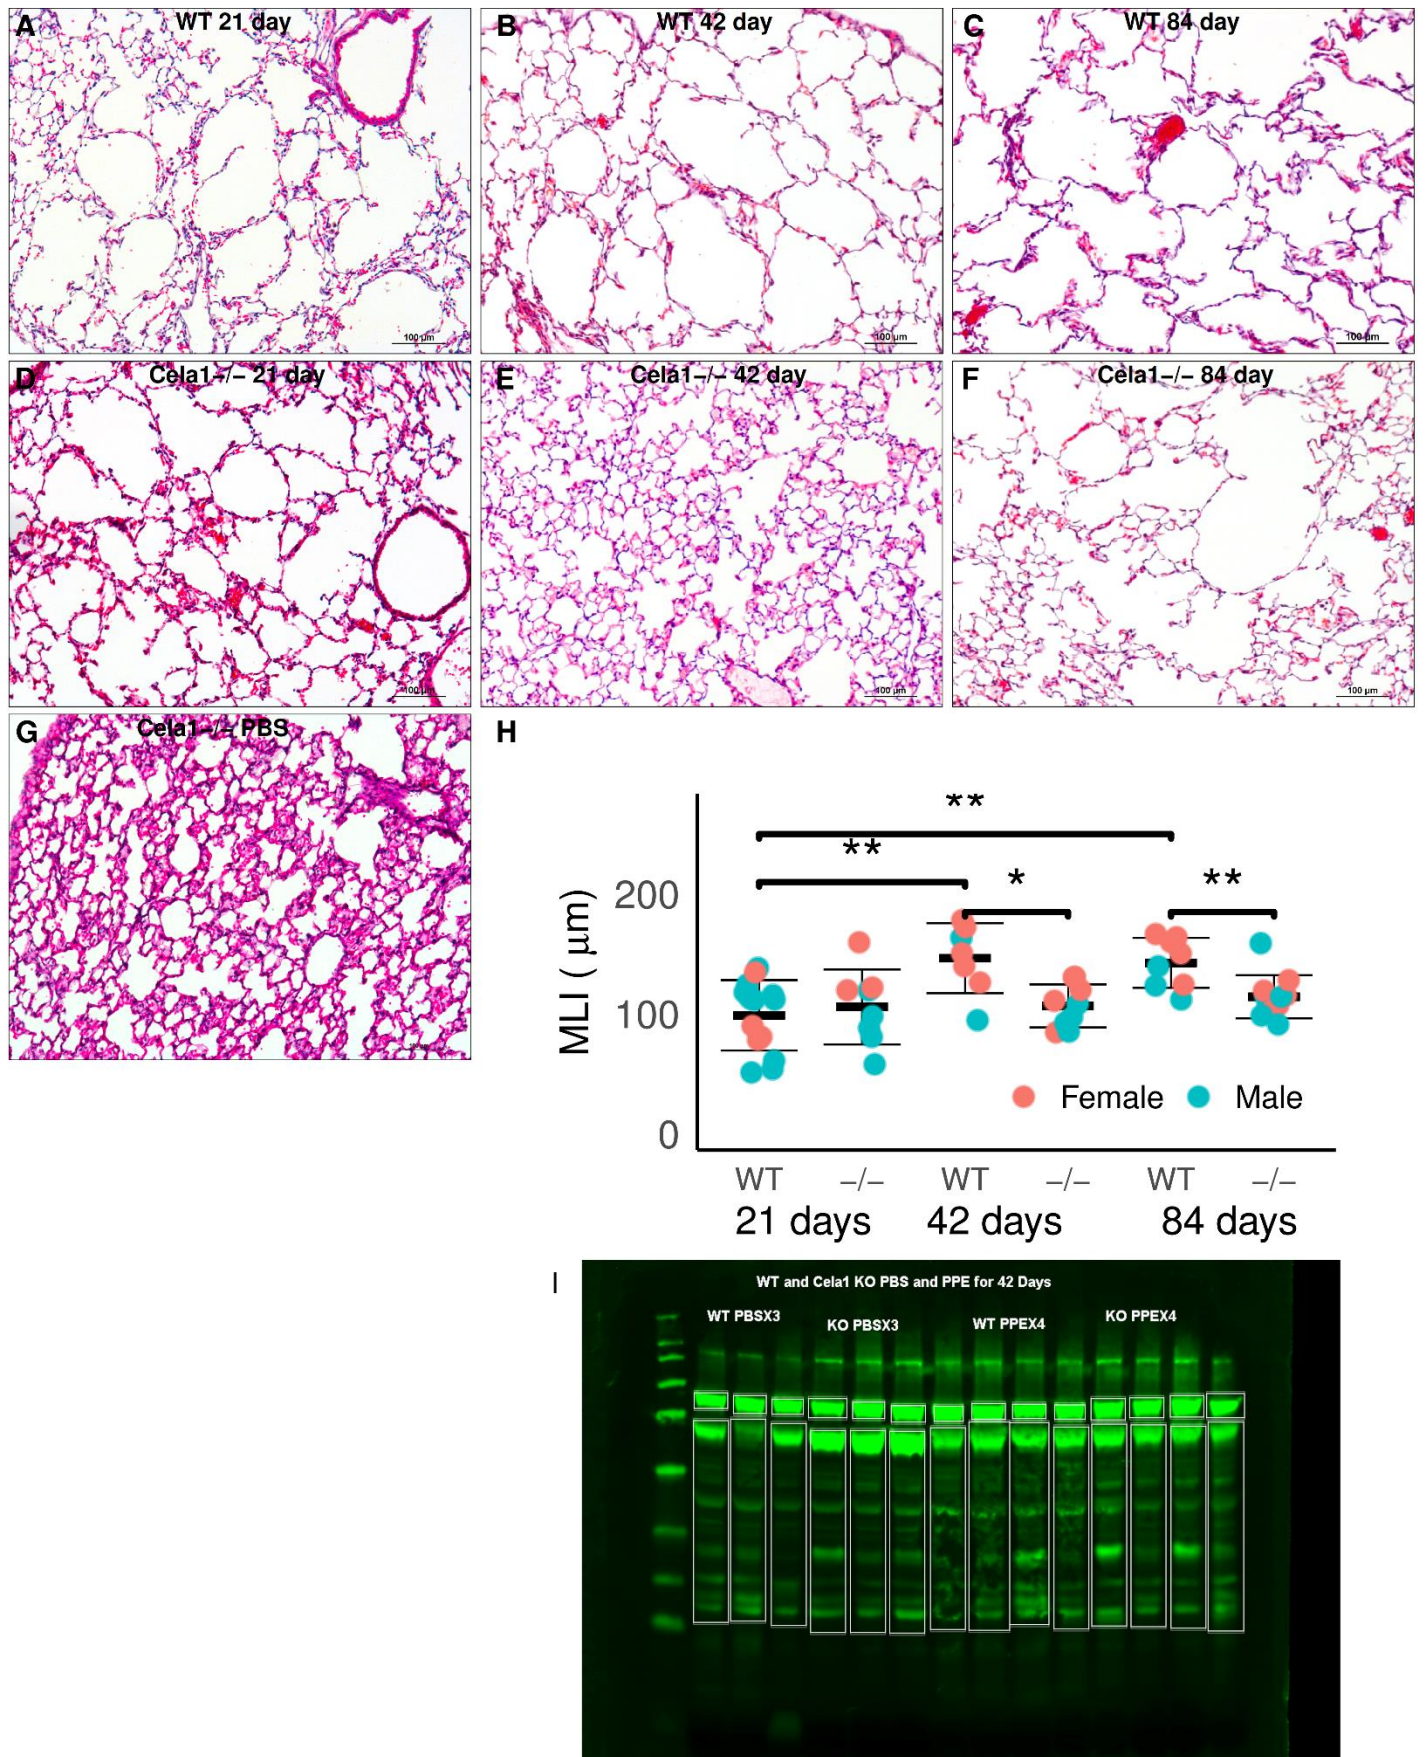

Supplemental Figure 3: Protection of *Cela1*<sup>-/-</sup> Mice in PPE Model. (A) Mice were treated with 2 units of PPE instilled into the posterior nasopharynx. Treated wildtype (WT) mice had evidence of airway simplification at 21 days. 10X photomicrograph, scale bar = 100  $\mu\text{m}$ . (B) This airspace simplification was worse at 42 days and (C) at 84 days. (D) *Cela1*<sup>-/-</sup>

<sup>-/-</sup> mice had a similar degree of airspace injury at 21 days. (E) However, at 42 and (F) 84 days, these mice did not experience progression of airspace simplification. (G) PBS-treated *Cela1*<sup>-/-</sup> mice had normal appearing airspace architecture. (H) Line and whisker plot showing the above differences. There was no difference in emphysema by sex. ANOVA  $p < 0.01$ . Tukey post hoc comparisons are shown. (I) Tropoelastin Western blot of mouse lung homogenates with densitometry quantification blocks showing intact (higher molecular weight box) and degraded (elongated, lower box) tropoelastin. \* $p < 0.05$ , \*\* $p < 0.01$ .

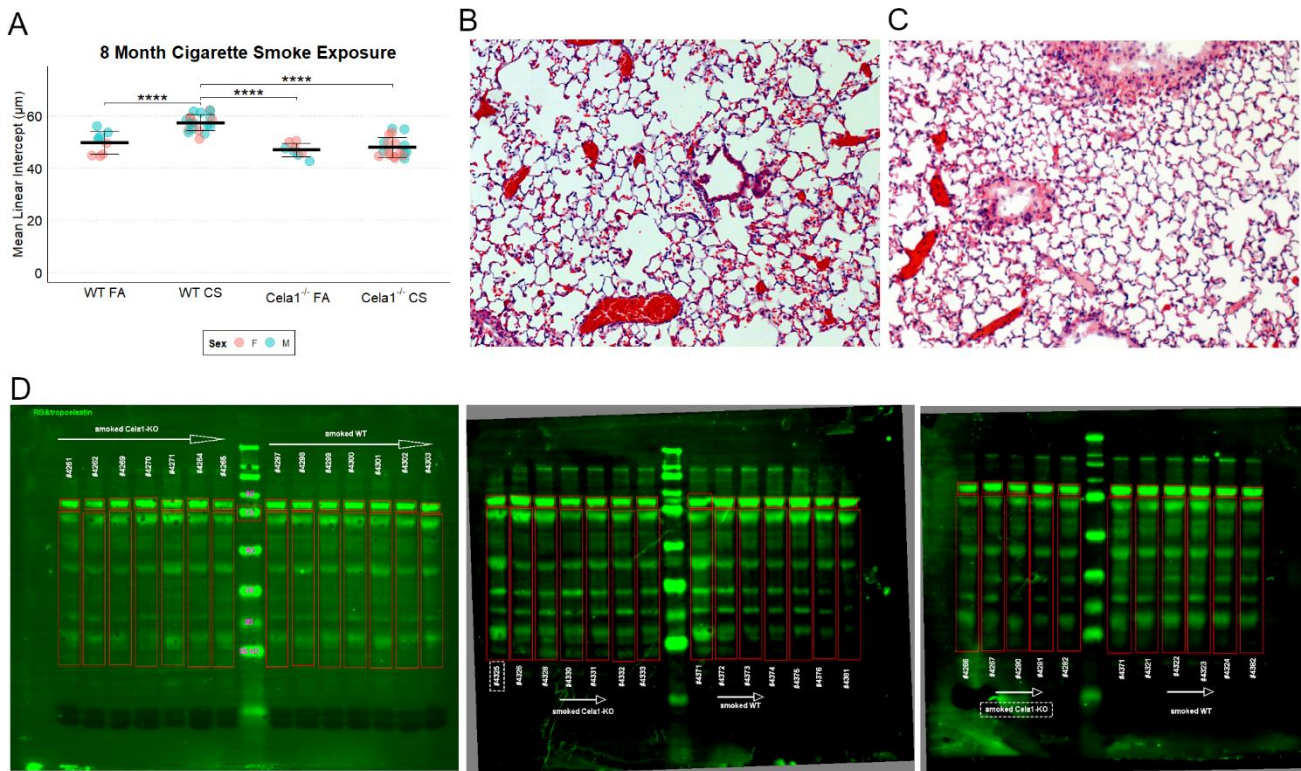

Supplemental Figure 4: Protection of *Ccl1*<sup>-/-</sup> Mice in Cigarette Smoke Model of Emphysema. (A) Compared to wildtype (WT) mice, *Ccl1*<sup>-/-</sup> mice had no difference in airspace size at baseline but were protected against airspace simplification in response to cigarette smoke (CS) exposure. There was no impact of sex on airspace size. ANOVA  $p < 0.00001$ . Tukey *post hoc* comparisons are shown. (B) Representative 10X photomicrograph of CS-exposed WT lung and (C) CS-exposed *Ccl1*<sup>-/-</sup> lung. (D) Three Western blot images of lung homogenates for quantification of intact (higher molecular weight box) and degraded (elongated, lower box) tropoelastin.

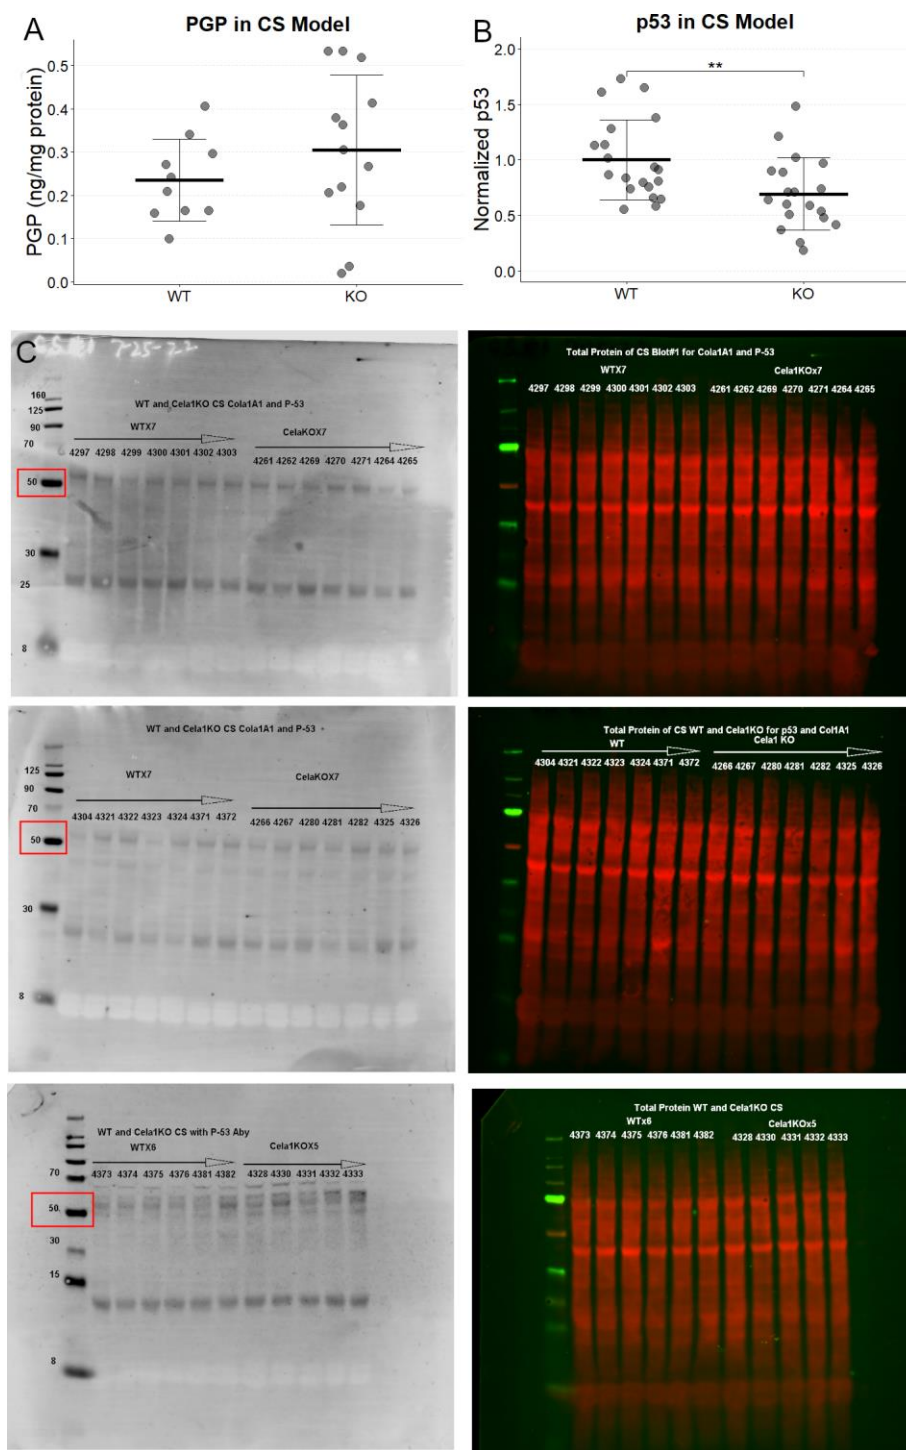

Supplemental Figure 5: Collagen and p53 in the CS Model. (A) Using mass spectrometry to quantify the collagen matrikine proline-glycine-proline (PGP), there were no significant differences between wild type and *Cela1*<sup>-/-</sup> mice after cigarette smoke exposure. (B) The senescence marker p53 was lower in the lungs of *Cela1*<sup>-/-</sup> mice exposed to cigarette smoke. Comparison by Welch's t-test. \*\*p<0.01. (C) Image blots of p53 on left and total protein on right to which signal was normalized. The red box highlights the 50 kDa molecular weight maker.

Supplemental Figure 6: Immune Cell Flow Cytometry Data in *Cela1<sup>-/-</sup>* Mice Treated with Tracheal Porcine Pancreatic Elastase. (A) A total of 250,000 cells were analyzed. Surface and cytoplasmic markers for each immune cell population showed that while most leukocytes were T-cells, the difference in T-cell numbers was not significant. The absolute numbers of neutrophils and eosinophils was significantly increased. (B) In evaluating the fraction of total leukocytes that each population accounted for, we also found that neutrophils and eosinophils were increased. \* $p < 0.05$ , \*\* $p < 0.01$  by Dunn's *post hoc* test after Kruskal-Wallis test  $p < 0.05$ .

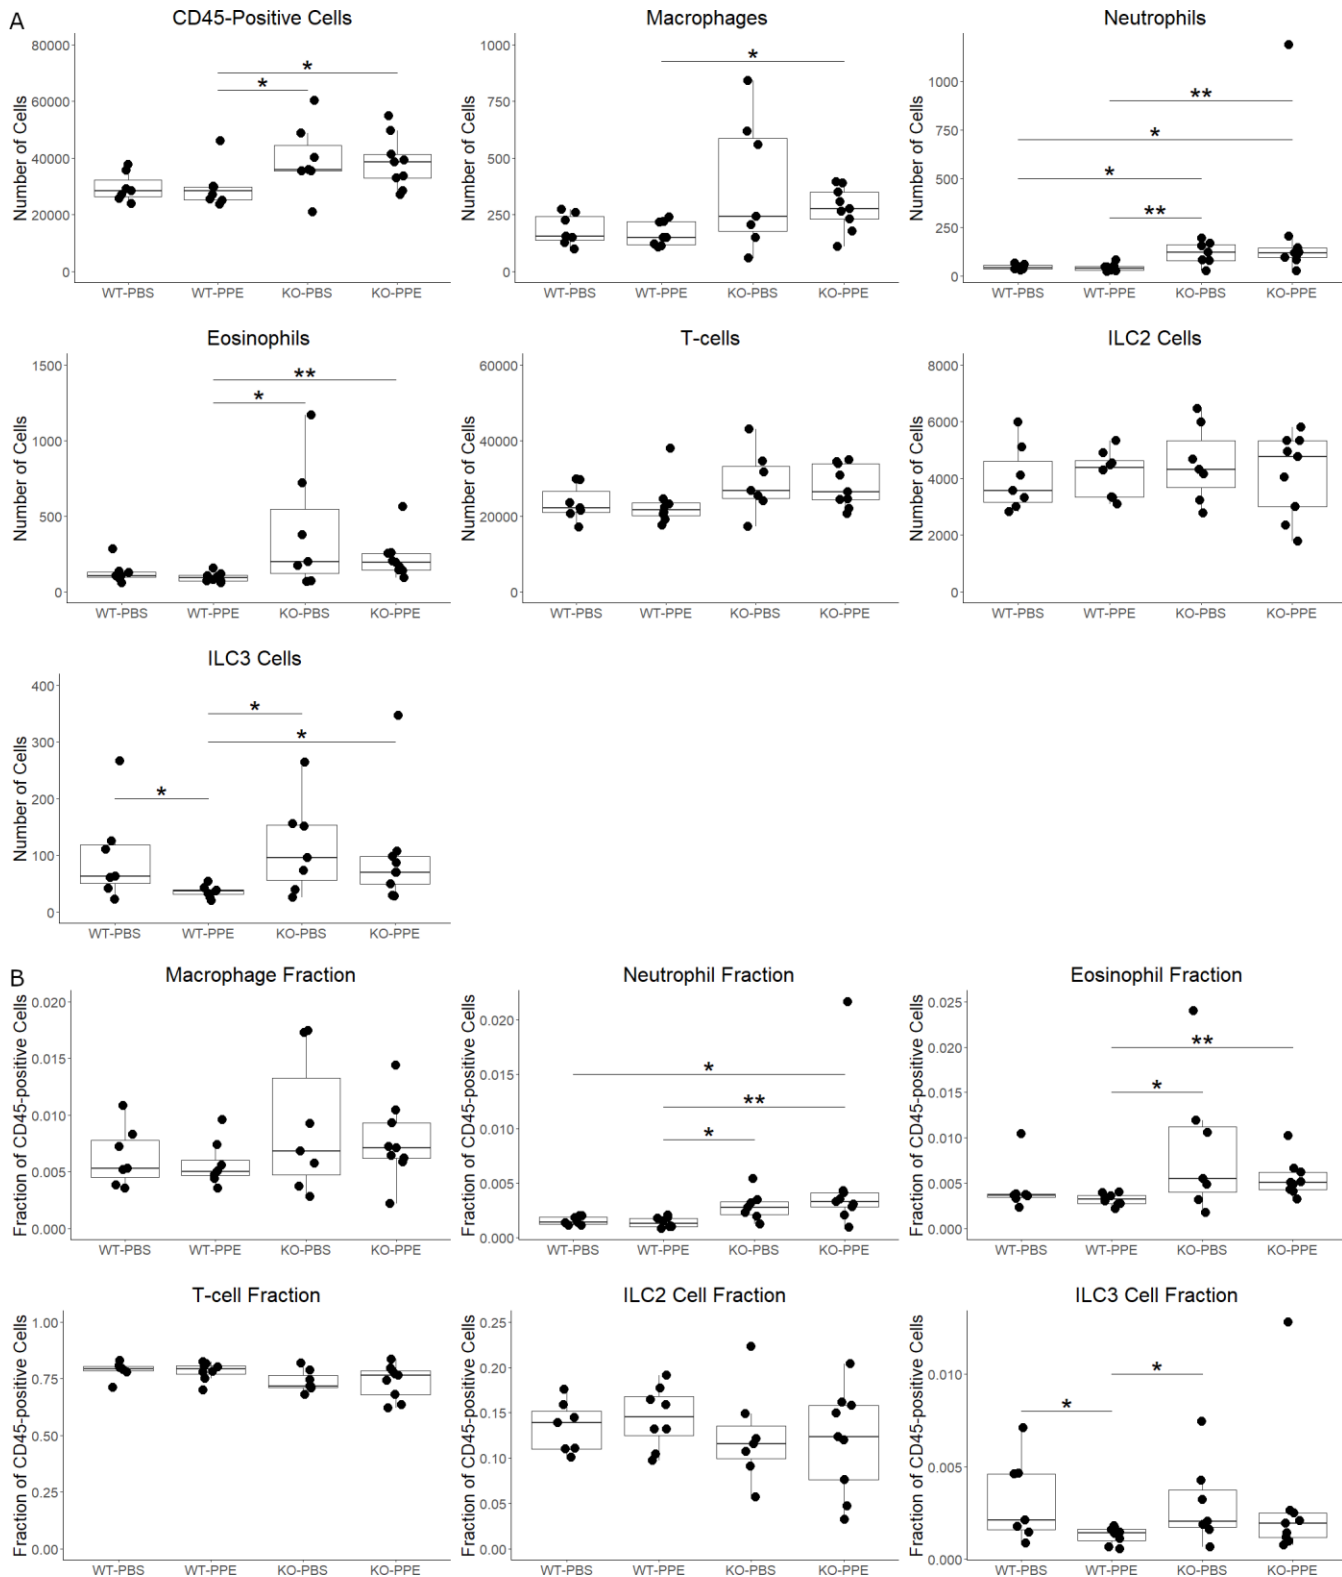

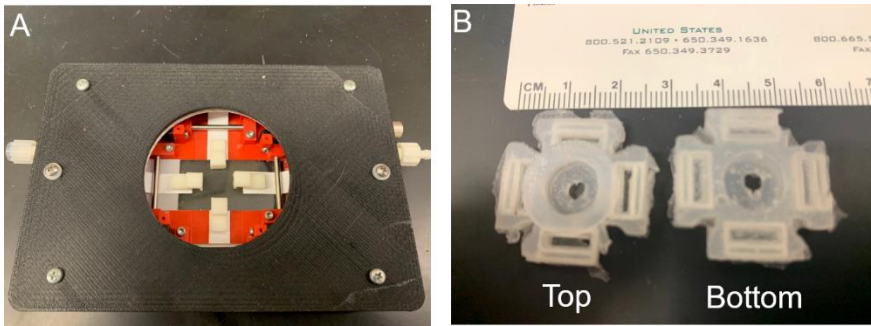

**Supplemental Figure 7: Biaxial Stretch of Human Lung Tissue.** (A) Image of a 3D-printed, confocal microscope stretching device. The device fits into a K-mount of a Nikon A1 confocal microscope and contains 4 small motors which incrementally turn a Tyvek strip to which is attached printed clips. These clips are secured to a silicone mount. (B) Silicone mount which is created using 3D-printed molds with embedded eyelets to which the clips are secured. 100  $\mu\text{m}$  sections of human lung are secured to the underside of the mount at four points using surgical glue.

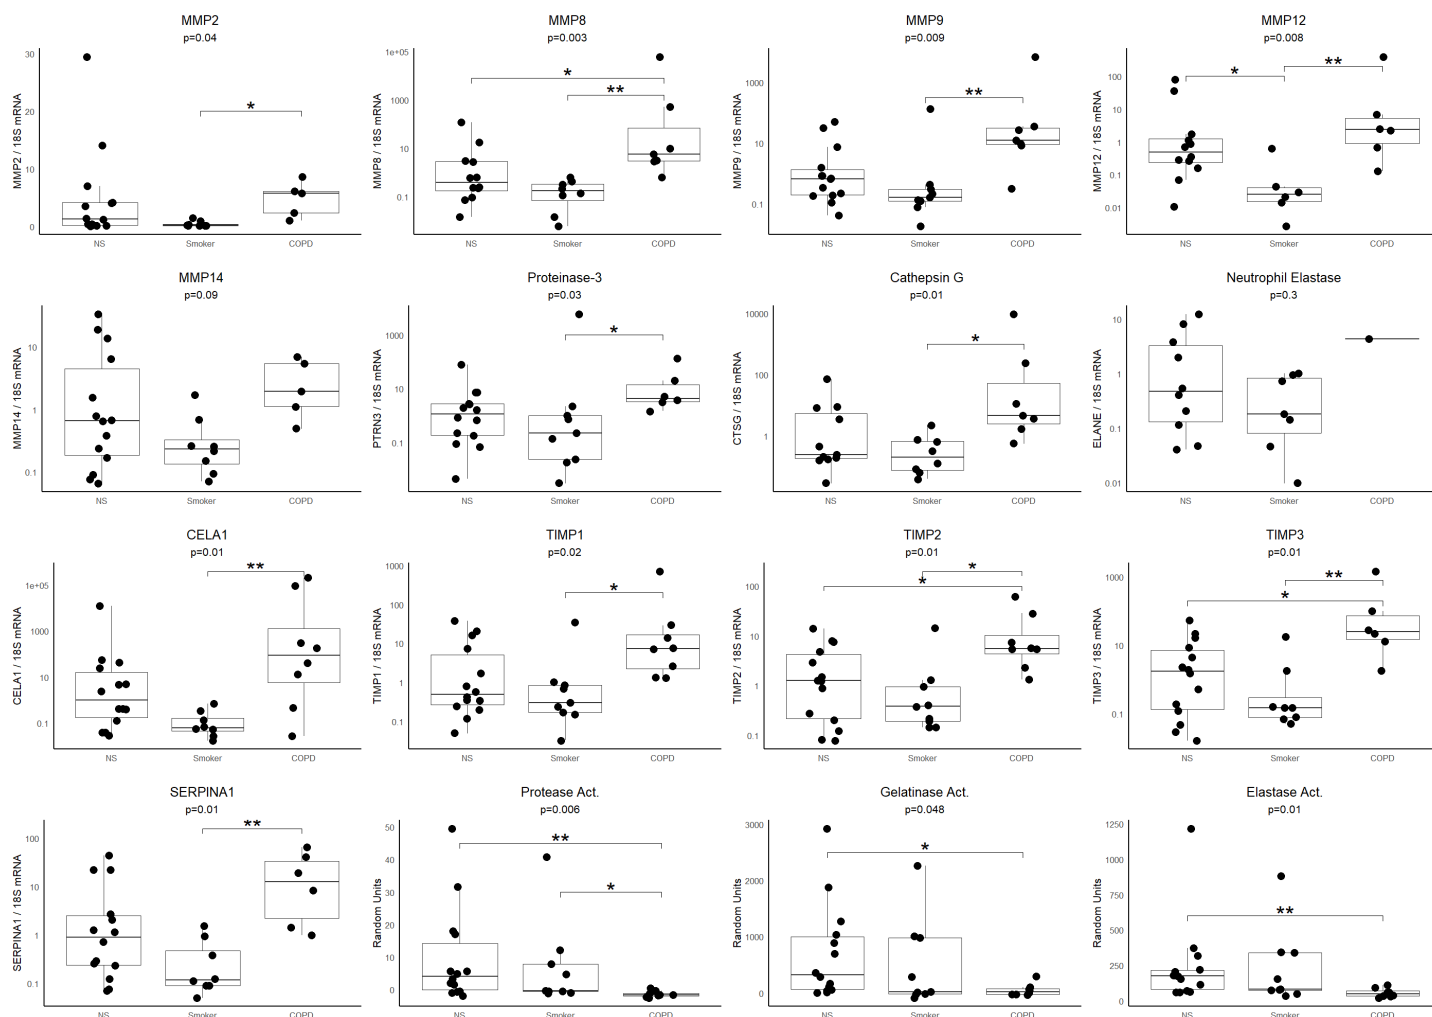

Supplemental Figure 8: mRNA Levels of COPD-associated Proteases and Anti-Proteases. The mRNA levels of matrix metalloproteinase 2 (MMP2), MMP8, MMP9, MMP12, MMP14, Proteinase-3, Cathepsin G, Neutrophil Elastase, CELA1, Tissue Inhibitor of Metalloproteinase-1 (TIMP1), TIMP2, TIMP3, and  $\alpha$ 1-antitrypsin (SERPINA1) were generally higher in COPD than smoker controls and non-smoker (NS) controls. Tissue protease, gelatinase, and elastase activities were all lower in COPD however. Kruskal-Wallis p values are shown.

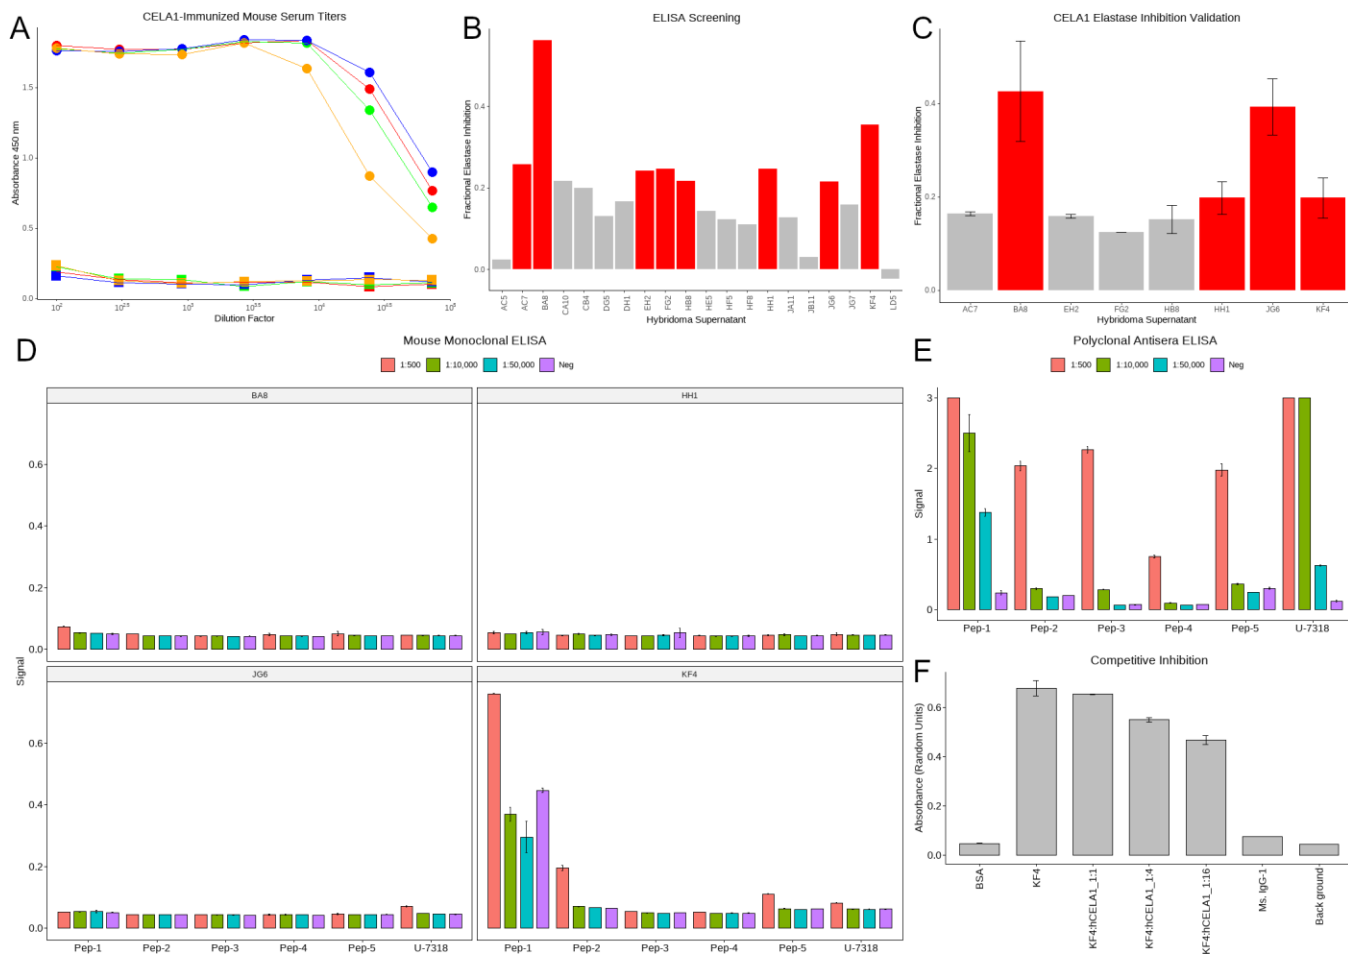

**Supplemental Figure 9: Identification of KF4 as Lead Candidate.** (A) The serum of four mice immunized with human CELA1 peptides all demonstrated high titers in an ELISA against recombinant CELA1. (B) Hybridomas were created and screened and the eight clones with the highest titers selected for functional screening. (C) The four clones (BA8, HH1, JG6, and KF4) with the greatest inhibition of CELA1 elastolytic activity were selected. (D) The immunizing peptides were immobilized and used for ELISA. Only KF4 detected one of the peptides used for immunization. (E) As a positive control, an anti-CELA1 polyclonal antibody was used and detected all the peptides. (F) KF4 was incubated with increasing ratios of recombinant CELA1 prior to testing by ELISA in a competitive inhibition assay. There was a serial reduction in ELISA signal.

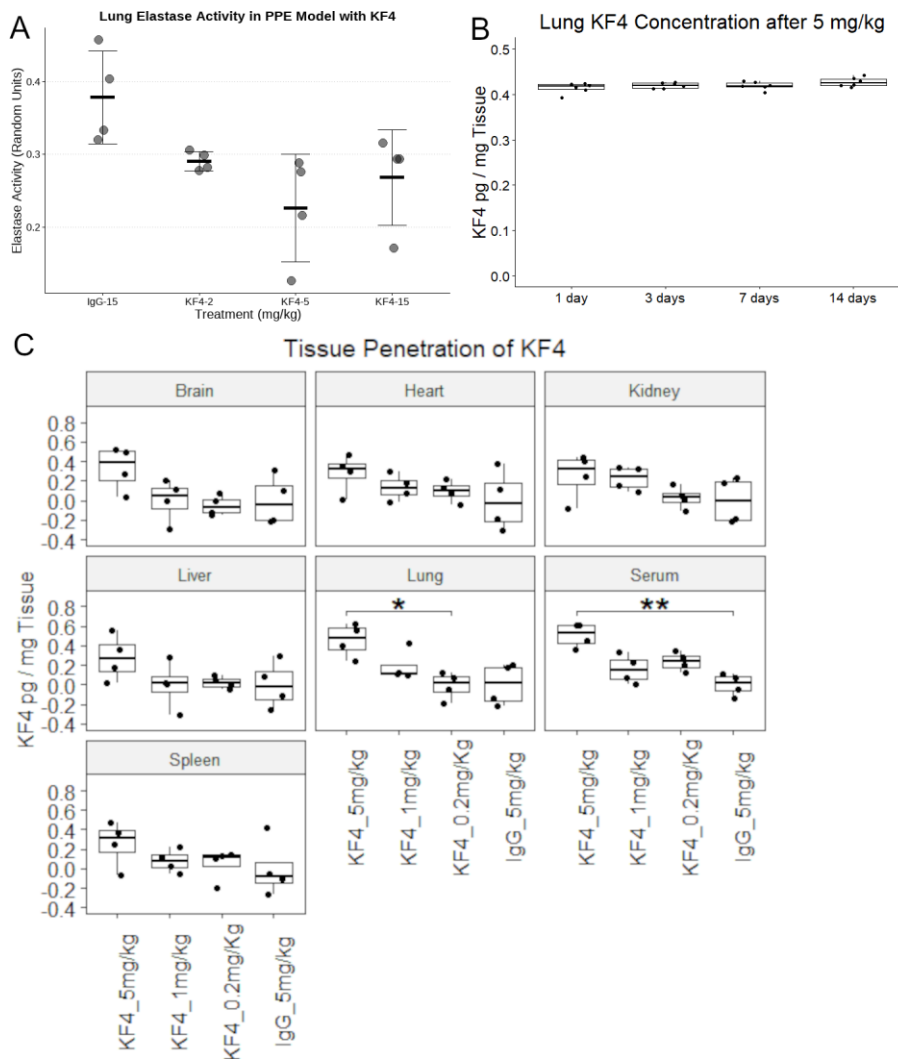

Supplemental Figure 10: KF4 Dosing and Tissue Penetration. (A) Mice were treated with PPE, and at 42 days were treated with 2, 5, or 15 mg/kg KF4 or 15 mg/kg IgG. Lung elastase activation was reduced most prominently in the 5 mg/kg dose.  $n=4$  per group. (B) KF4 was conjugated with AlexaFluor-647 and the amount of KF4 present in lung tissue at different time points was determined. KF4 levels remained relatively constant for at least 14 days. (C) Fluorophore-conjugated KF4 was administered to mice at 0.2, 1, and 5 mg/kg. The dose dependent penetration at 24 hours in different tissues was determined by collecting, homogenizing, and quantifying the fluorescence signal of 10 mg tissue. Lung and serum Kruskal-Wallis  $p < 0.05$ . Dunn *post hoc* test shown. \* $p < 0.05$ , \*\* $p < 0.01$
